# Supplementary material
Source: Elsevier journal article supplement (https://www.sciencedirect.com/science/article/pii/S2173574319301868)
Supplement: mmc1 [file S2173574319301868:mmc1.docx]

**Título:** Patrones de tratamiento biológico en pacientes con enfermedades articulares inflamatorias: Estudio retrospectivo de 4 años de seguimiento

**Autores:** Juan D Cañete, Antonio Naranjo, Javier Calvo, Carmen Ordás, Belén Aragón, Gonzalo Nocea, Montse Roset, Antonio Fernández-Nebro.

# Archivos suplementarios

Investigadores y centros del estudio

| **Region** | **Hospital** | **Investigadores** |
| --- | --- | --- |
| CASTILLA LEÓN | H. Río Hortega (Valladolid) | **José Manuel Martín Santos** |
| CASTILLA LEÓN | Complejo Asistencial Ávila (H. Nstra. Sra. de Sonsoles) | **Mª del Carmen Torres Martín** / Montserrat Corteguera Coro |
| MADRID | H. Puerta de Hierro | **José Campos (COL) /** IP: Juan Mulero Mendoza |
| GALICIA | Complejo Hospitalario U. de A Coruña (CHUAC) | **Francisco Javier de Toro Santo** |
| ANDALUCÍA | H. Reina Sofia (Córdoba) | **Mª Carmen Castro Villegas** / Jerusalén Calvo Gutiérrez / Pilar Font Ugalde / Desireé Ruiz Vilchez |
| MURCIA | H. Clínico U. Virgen de la Arrixaca | **Manuel José Moreno Ramos** / Mª José Moreno Martínez |
| MURCIA | H. Gral. U. Morales Meseguer | **Mª Francisca Pina Pérez** |
| COMUNIDAD VALENCIANA | H. Gral. U. de Valencia | **María Dolores Pastor Cubillo** / Javier Calvo Català / Cristina Campos Fernández / Amalia Rueda Cid |
| I. CANARIAS | H. U. de Canarias | **Sagrario Bustabad Reyes** / Esmeralda Delgado Frías |
| ANDALUCÍA | H. Regional U. Carlos Haya (Málaga) | **Antonio Fernandez Nebro**/ Virginia Coret Cagigal / Mª Ángeles Belmonte López / Sara Manrique Arija |
| CATALUÑA | H. Clínic i Provincial de Barcelona | **Juan D Cañete /** Mª Victoria Hernández |
| MADRID | H. Príncipe de Asturias | **Eduardo Cuende Quintana** / Atusa Movasat Hajkhan / Ana Isabel Sánchez Atrio / Ana Isabel Turrión Nives/ Cristina Bohorquez Heras |
| ARAGÓN | H Comarcal Barbastro | **José Manuel Pina Salvador** |
| MURCIA | H. Rafael Méndez (Lorca) | **Mª Rocío González Molina** |
| ARAGÓN | H. Obispo Polanco | **Emilio Giner Serret** |
| I. BALEARES | H. Mateu Orfila (Maó) | **Concepción Moll Tuduri** / Laura / Benita Cardona / Natalia Casanovas Pons |
| PAÍS VASCO | H. de Basurto | **Clara Pérez Velasquez (COL) /** IP: María Luz García Vivar |
| ANDALUCÍA | H. U. San Cecilio (Granada) | **Enrique Raya Álvarez** / Inmaculada Jiménez |
| COMUNIDAD VALENCIANA | H. General de Elda (Alicante) | Alejandro San Martín Álvarez |
| ANDALUCÍA | H. U. Virgen Macarena | **Federico Navarro Sarabia** / Carmen Vargas Lebrón / Virginia Moreira Navarrete |
| MADRID | H.U. Fundación de Alcorcón | **Pedro Zarco Montejo /** Raquel Almodóvar |
| ARAGÓN | H. U. Miguel Servet (Zaragoza) | **Francisco Javier Manero Ruiz** / Amelia Oecondón Español / Chesús Beltrán Audera / Marta Medrano San Ildefonso |
| CATALUÑA | H. de Palamos | **Ramon Valls Garcia** / Mª Teresa Clavaguera Poch |
| ASTURIAS | H. de Cabueñes (Gijón) | **Tomás Tinturé Eguren** / Carmen Ordas Calvo |
| MADRID | H. Severo Ochoa | **María Alcalde Villar** / Ana Cruz Valenciano |
| CATALUÑA | H. Sant Pau | Arturo Rodríguez de la Serna |
| CASTILLA LA MANCHA | Complejo H. de Albacete (H. Perpétuo Socorro) | Enrique Judez Navarro /Ginés Sánchez Nievas |
| MURCIA | H.G.U Santa Lucía | **Fernando José Rodriguez Martínez /** Vicente Cogolludo Campillo |
| MADRID | H. Gregorio Marañón | **Carlos González Fernández** |
| COMUNIDAD VALENCIANA | H. General de Castellón | **Miguel Angel Belmonte /** Patricia Tejón |
| I. CANARIAS | H. Dr. Negrín | **Antonio Naranjo Hernández /** Rubén López |
| EXTREMADURA | H. de Mérida | **Eugenio Chamizo Carmona** / Juan José Aznar / Adela Gallego |
| COMUNIDAD VALENCIANA | H. Clínico U. de Valencia | **Pilar Trenor Larraz /** Elisa Buenaga (coord. EECC) |
